# Supplementary material
Source: MDPI journal article supplement (https://www.mdpi.com/1424-8247/17/3/319)
Supplement: s1 [file s1]

Supplementary Material

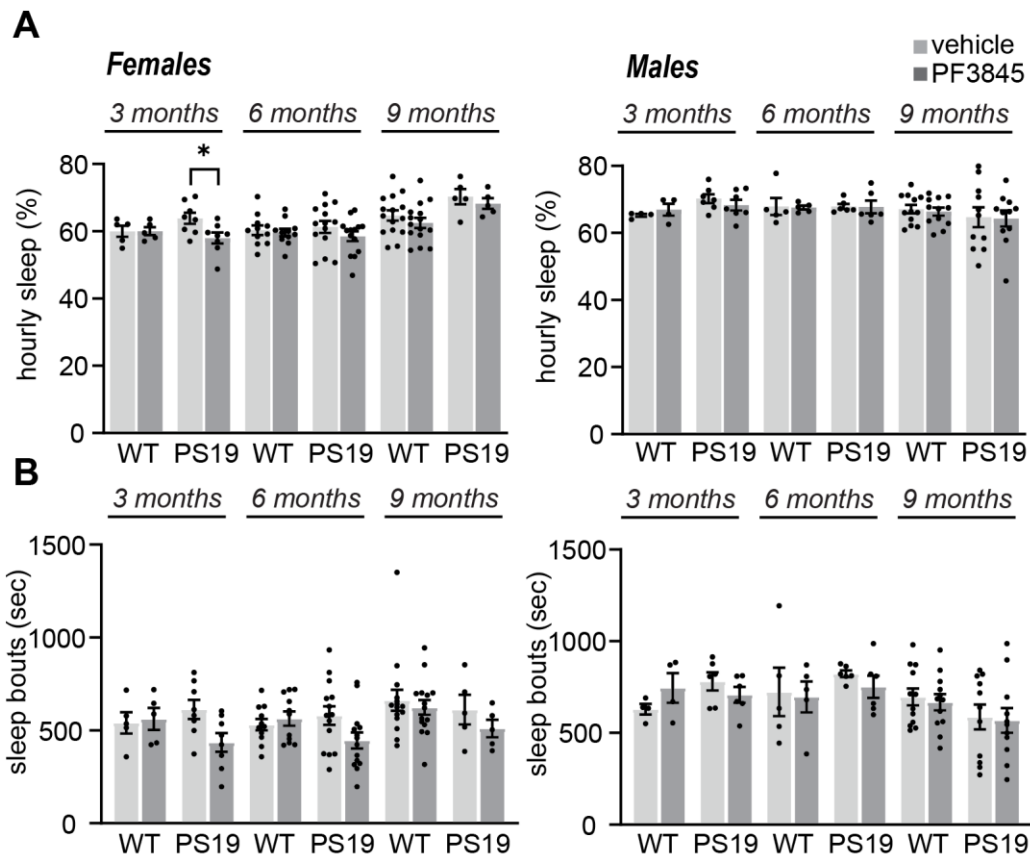

Supplemental Figure S1. Selective increased AEA does not promote light-phase sleep behavior in PS19 mice, subsequent to dark phase PF3845 dosing. (A) Quantification of average hourly light phase sleep in females and males. (B) Quantification of average light phase sleep bout length in seconds in females and males. N=5-16/age/sex/genotype. \* $p < 0.05$ . Paired two-tailed student's t-test. Error bars indicate  $\pm$  SEM.
